# Supplementary material
Source: publisher site journal article supplement (https://www.dovepress.com/article/557670)
Supplement: Supplementary file 1 [file 557670_Figure%2520S1.docx]

**Figure S1.** Proportion of PSCI across different risk groups.


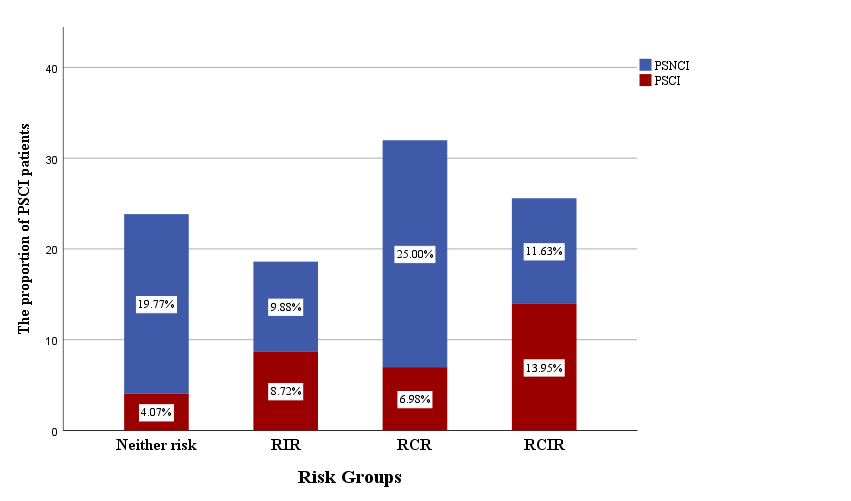


(PSCI, post-stroke cognitive impairment; PSNCI, post-stroke no cognitive impairment; RIR, residual inflammatory risk; RCR, residual cholesterol risk; RCIR, residual cholesterol and inflammatory risk.)
